# Supplementary material for: Interannual variability and trends of combustion aerosol and dust in major continental outflows revealed by MODIS retrievals and CAM5 simulations during 2003–2017
Source: Copernicus journal article supplement (doi:10.5194/acp-20-139-2020), 2020-01-03
Supplement: Supplementary file [file acp-20-139-2020-supplement.pdf]

Supplement of Atmos. Chem. Phys., 20, 139–161, 2020  
<https://doi.org/10.5194/acp-20-139-2020-supplement>  
© Author(s) 2020. This work is distributed under  
the Creative Commons Attribution 4.0 License.

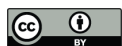

*Supplement of*

**Interannual variability and trends of combustion aerosol and dust in major continental outflows revealed by MODIS retrievals and CAM5 simulations during 2003–2017**

**Hongbin Yu et al.**

*Correspondence to:* Hongbin Yu ([hongbin.yu@nasa.gov](mailto:hongbin.yu@nasa.gov))

The copyright of individual parts of the supplement might differ from the CC BY 4.0 License.

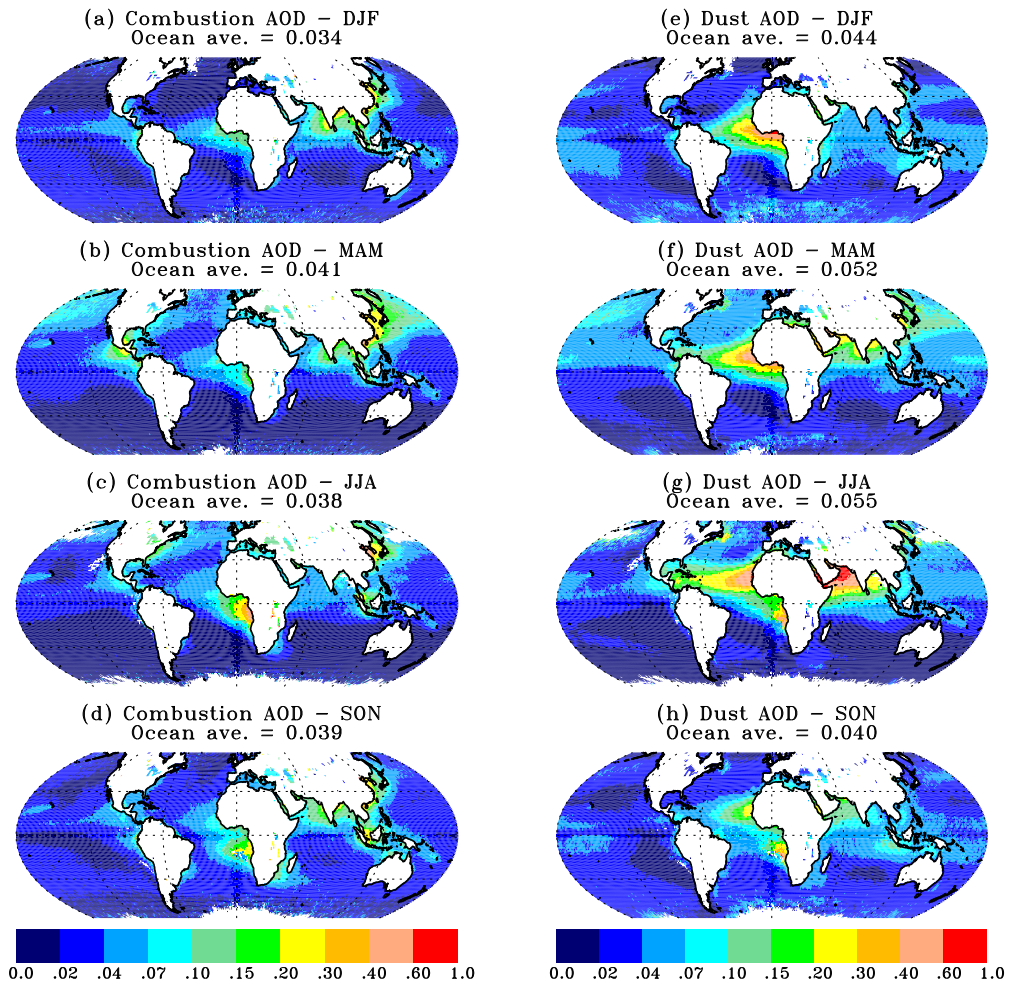

**Figure S1:** The MODIS/Aqua seasonal mean combustion AOD ( $\tau_c$ , a - d) and dust AOD ( $\tau_d$ , e - h) averaged over 2003-2015.

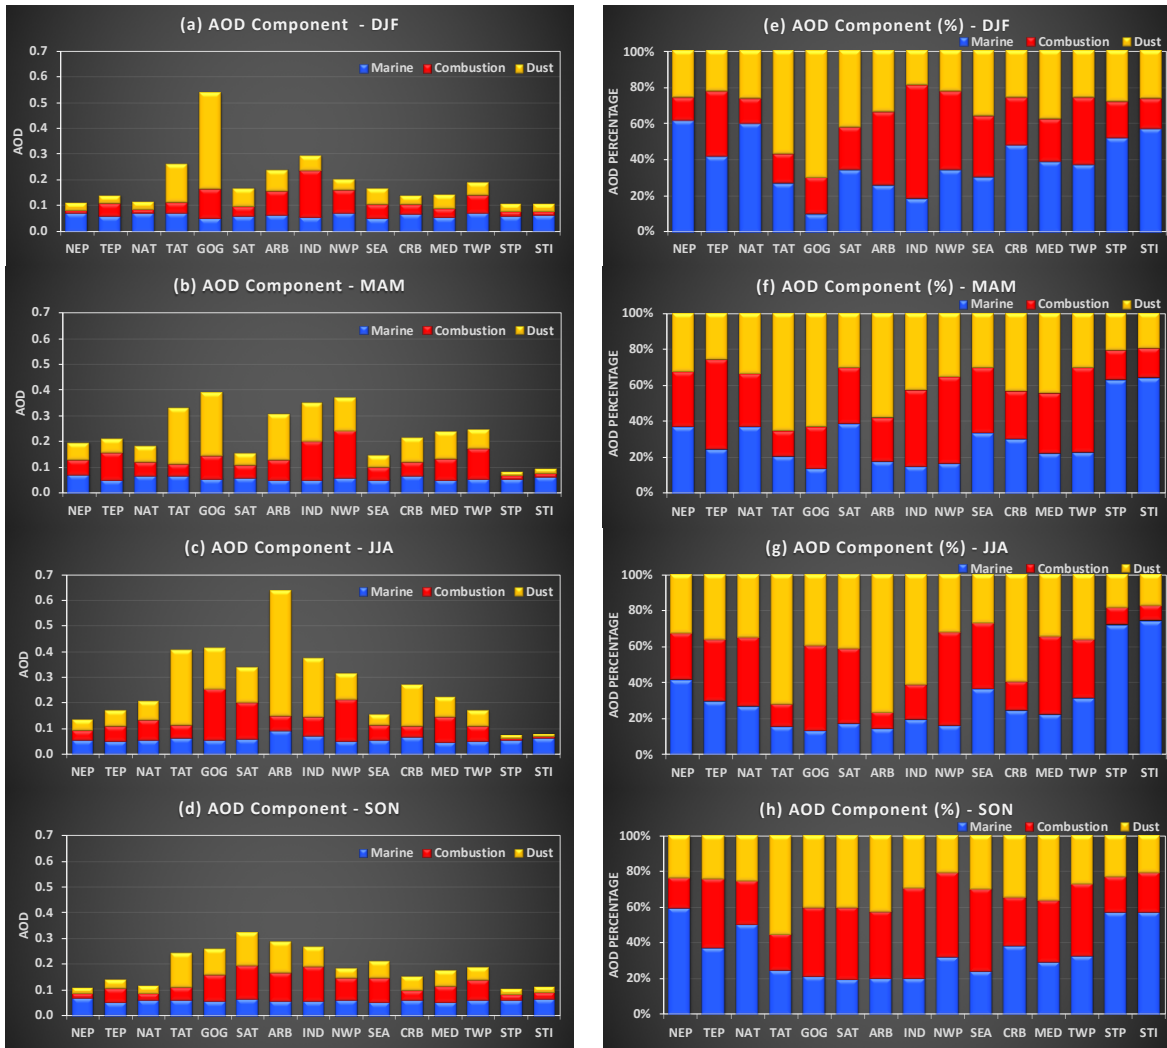

**Figure S2:** Aerosol component climatology with seasonal distinctions in the 15 regions as derived from 2003-2017 MODIS Aqua observations: (a - d) for magnitude of component AOD, and (e - g) for percentage of component AOD.

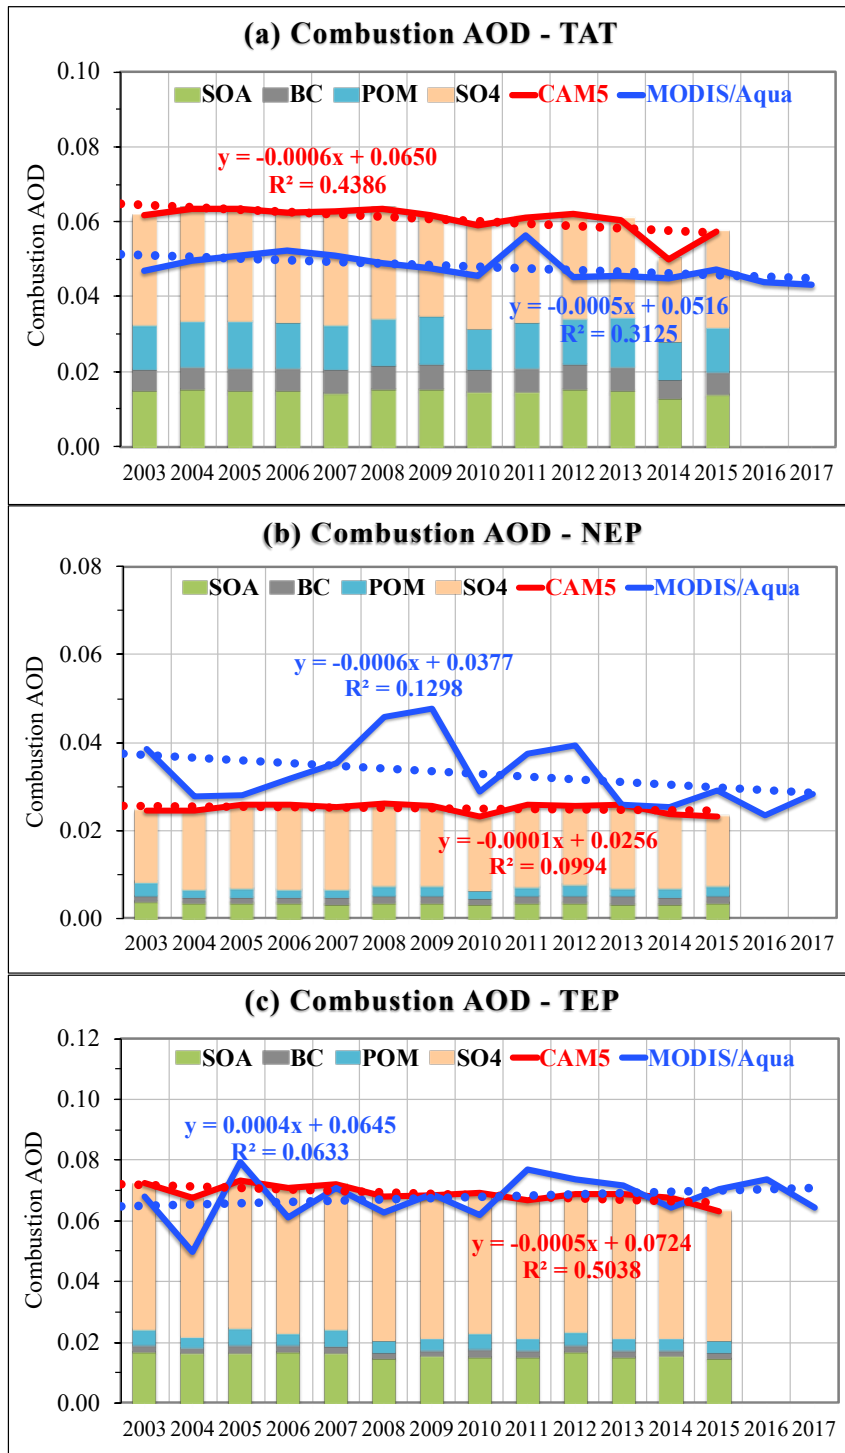

**Figure S3:** Interannual variability of combustion aerosol optical depth in (a) TAT, (b) NEP, and (c) TEP outflows derived from MODIS/Aqua and CAM5.



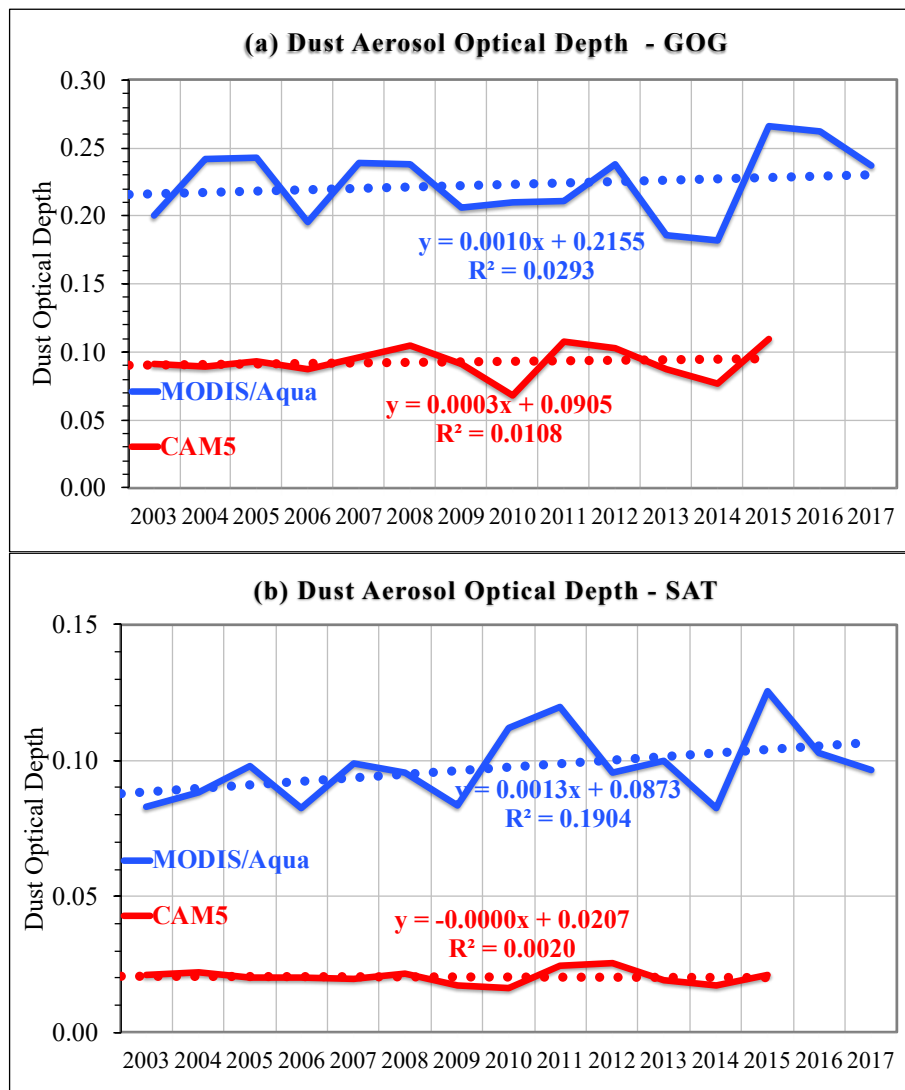

**Figure S4:** Interannual variability of dust aerosol optical depth in (a) GOG and (b) SAT outflows derived from MODIS/Aqua and CAM5.
